# Supplementary material for: Liposomes loaded with polyphenol-rich grape pomace extracts protect from neurodegeneration in a rotenone-basedin vitromodel of Parkinson's disease
Source: Royal Society of Chemistry journal article supplement (doi:10.1039/d1bm01202a), 2021-01-01
Supplement: d1bm01202a1.pdf [file d1bm01202a1.pdf]

# Electronic Supplementary Information

for

Liposomes Loaded with Polyphenol-Rich Grape Pomace Extracts

Protect from Neurodegeneration in a Rotenone-Based *in Vitro*

Model of Parkinson's Disease

*Attilio Marino<sup>1,†,\*</sup>, Matteo Battaglini<sup>1,†</sup>, Andrea Desii<sup>1</sup>, Chiara Lavarello<sup>2,3</sup>, Giada Genchi<sup>1</sup>,*

*Andrea Petretto<sup>2</sup>, Gianni Ciofani<sup>1,\*</sup>*

## AUTHOR ADDRESS

<sup>1</sup>Istituto Italiano di Tecnologia, Smart Bio-Interfaces, Viale Rinaldo Piaggio 34, 56025 Pontedera, Italy

<sup>2</sup>IRCCS Istituto Giannina Gaslini, Core Facilities-Clinical Proteomics and Metabolomics, Via Gerolamo Gaslini 5, 16147 Genova, Italy

<sup>3</sup>University of Genoa, Department of Chemistry and Industrial Chemistry, Via Dodecaneso 31, 16146 Genova, Italy

## AUTHOR INFORMATION

### Corresponding Author

\*Attilio Marino ([attilio.marino@iit.it](mailto:attilio.marino@iit.it)) and Gianni Ciofani ([gianni.ciofani@iit.it](mailto:gianni.ciofani@iit.it)) are the corresponding authors.

### Author Contributions

†These authors equally contributed to this work

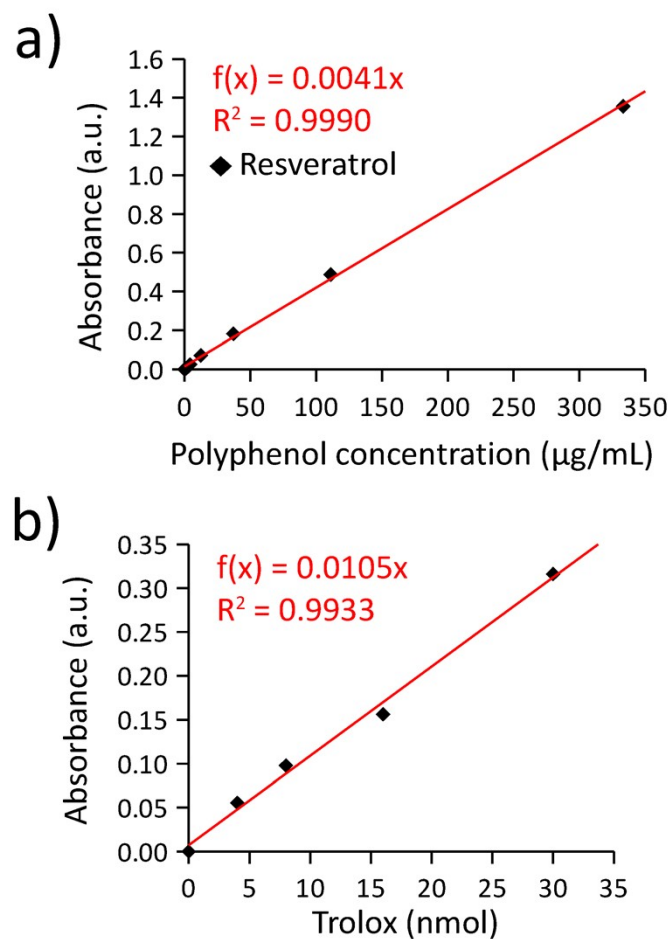

**Figure S1.** a) Folin-Ciocalteu assay calibration curve for resveratrol at different concentrations (0.00, 1.37, 4.12, 12.35, 37.04, 111.11, and 333.33  $\mu\text{g/mL}$ ). b) Antioxidant capacity evaluation calibration curve for 0, 4, 8, 16, and 30 nmol of trolox.

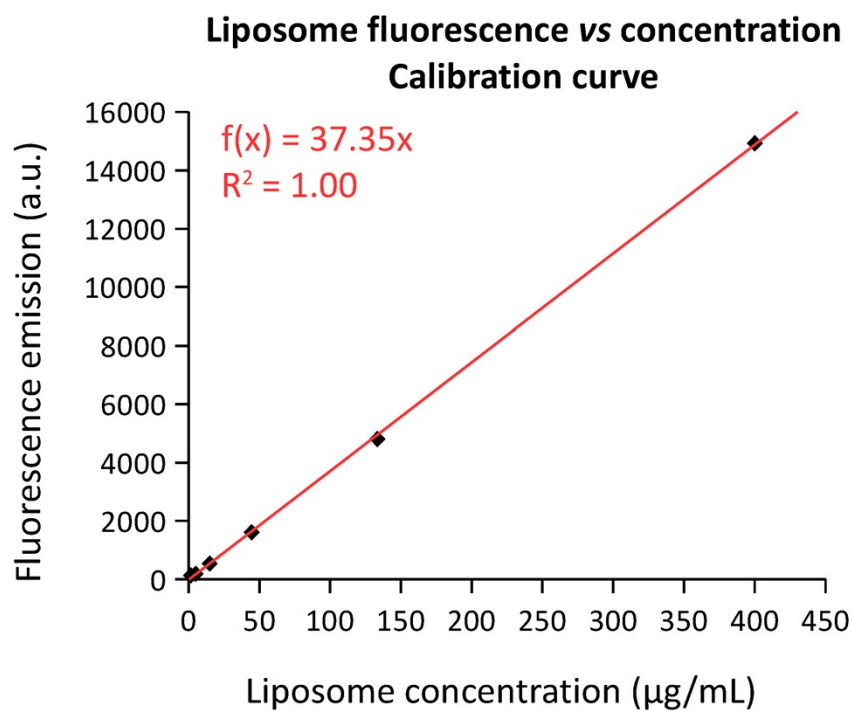

**Figure S2.** Calibration curve for ext-LS quantification, performed with 1.65, 4.49, 14.81, 44.44, 133.33, and 400  $\mu\text{g/mL}$  DiO-stained ext-LSs.

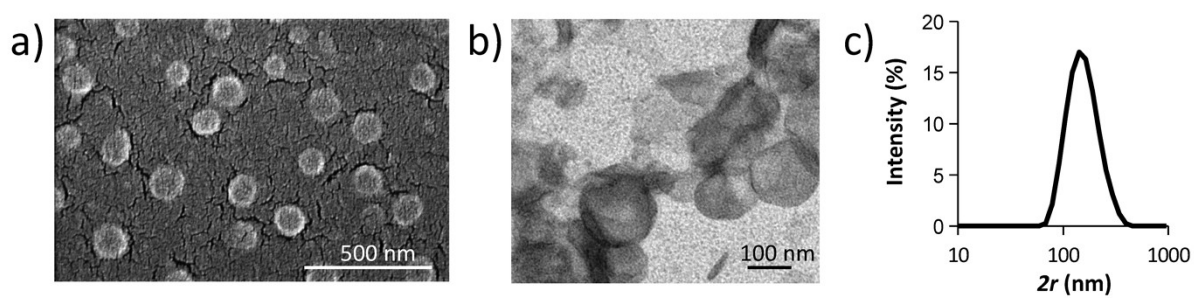

**Figure S3.** a) Representative scanning electron microscopy (SEM) image, b) transmission electron microscopy image and c) hydrodynamic size ( $2r$ ) of empty liposomes.

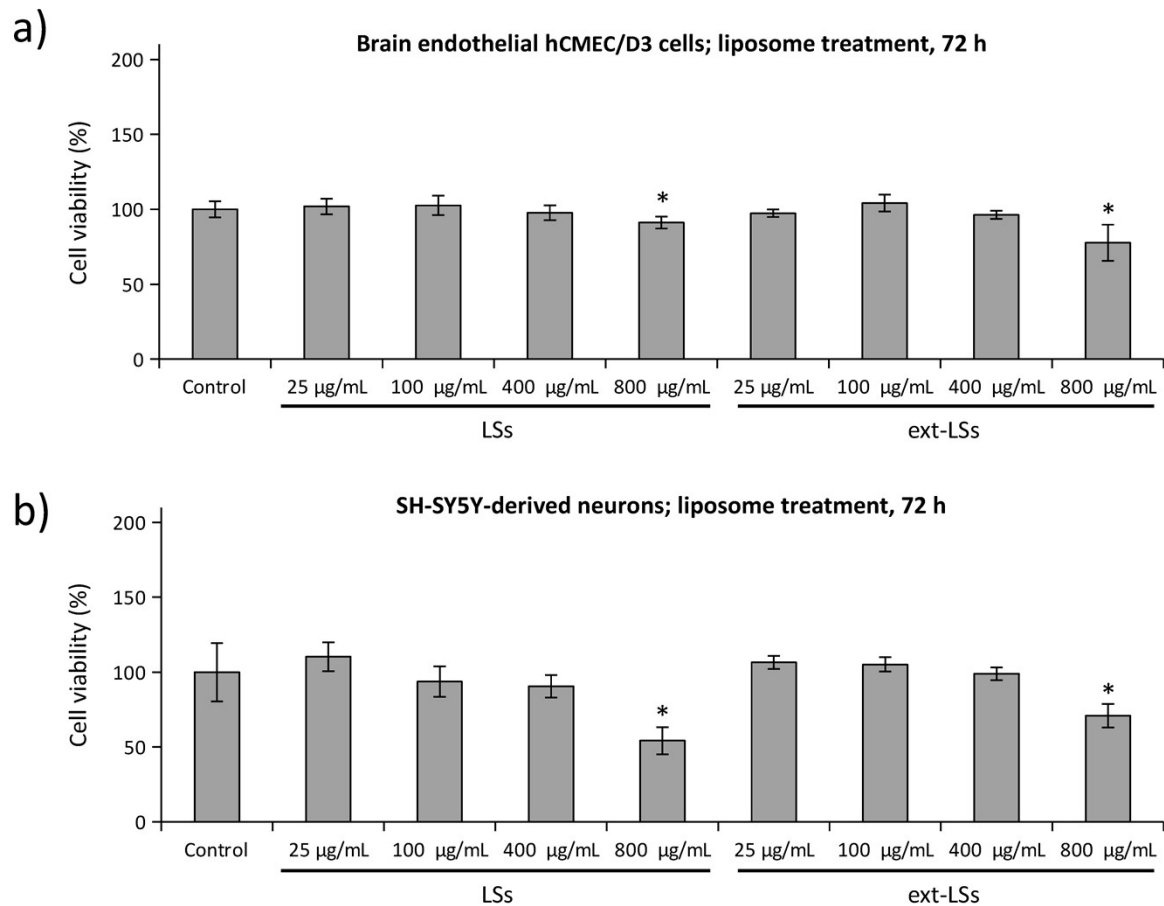

**Figure S4.** WST-1 cell viability assay for a) brain endothelial hCMEC/D3 cells and b) SH-SY5Y-derived neurons treated for 72 h with non-loaded LSs or ext-LSs (0, 25, 100, 400, or 800 µg/ml concentrations). \* $p < 0.05$ .

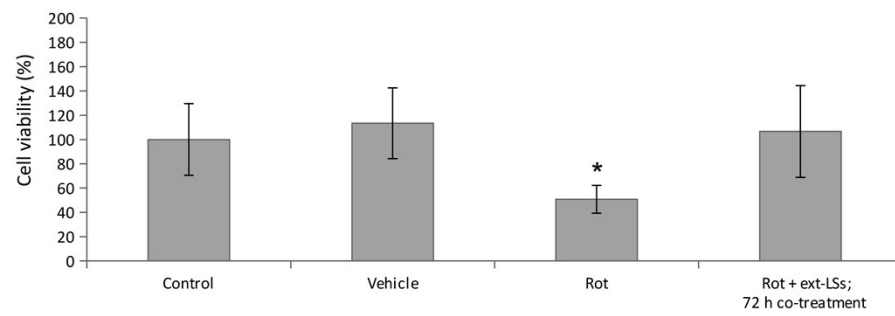

**Figure S5.** WST-1 cell viability assay of SH-SY5Y-derived neurons treated with rot (1.00  $\mu$ M) for 72 h (“Rot”), or with combined 1.00  $\mu$ M rot + ext-LS for 72 h (“Rot + ext-LSs; 72 h co-treatment”). The vehicle is DMSO (1:1000). \* $p < 0.05$ .

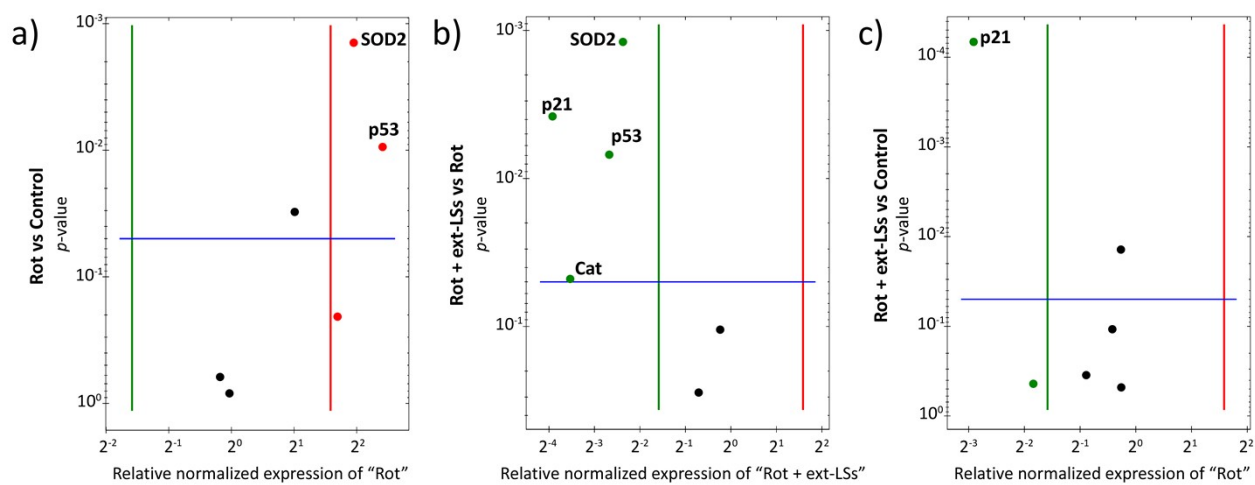

**Figure S6.** Volcano plot showing the  $p$ -value versus the fold change in qRT-PCR analysis for a) "Rot" vs. "Control", b) "Rot + ext-LSs" vs. "Rot", and c) "Rot + ext-LSs" vs. "Control".

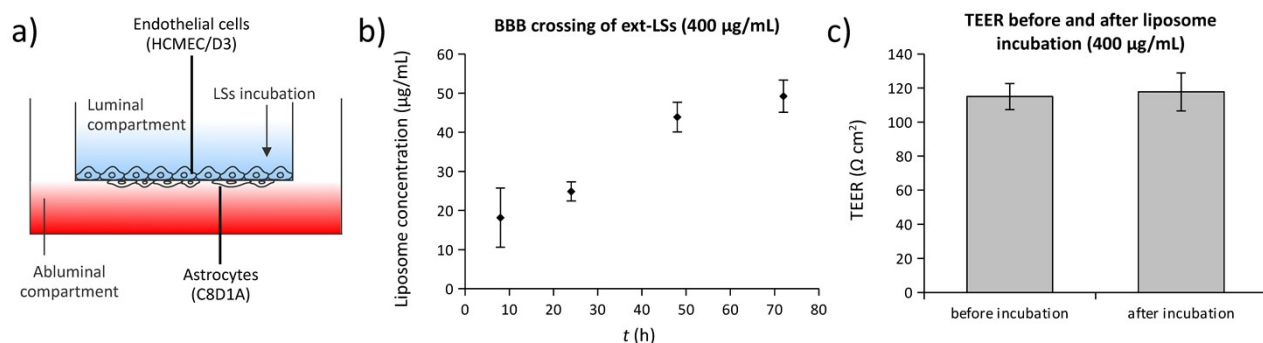

**Figure S7.** BBB crossing of the ext-LSs investigated on a multicellular *in vitro* model. a) Schematic representation of the *in vitro* BBB system with luminal (in blue) and abluminal (in red) compartments separated by astrocytes and by an endothelial cell layer; b) ext-LS concentration detected in the abluminal compartment at different time points (0, 8, 24, 48, 72 h) after incubating the luminal compartment with 400  $\mu\text{g/mL}$  DiO-stained ext-LSs; c) Transendothelial electrical resistance (TEER) measured before and after ext-LS incubation.



**Table S1.** Sequence of the forward (F) and reverse (R) primers used for the qRT-PCR.

| <b>Gene</b> | <b>Primer sequence</b>           |
|-------------|----------------------------------|
| Cat_F       | 5'-TGAAGTGTCCCTACCGTGCT-3'       |
| Cat_R       | 5'-GGAGCACCACCCTGATTGTC-3'       |
| GSS_F       | 5'-GACCAAGACCGAAGGCTGTT-3'       |
| GSS_R       | 5'-AGACGTGCTTCCCAATTCTGTA-3'     |
| Hprt1_F     | 5'-AGATGGTCAAGGTCGCAAG-3'        |
| Hprt1_R     | 5'-GTATTCATTATAGTCAAGGGCATACT-3' |
| Rpl32_F     | 5'-GAGCGATCTCGGCACAGTA-3'        |
| Rpl32_R     | 5'-GAAGTTCCTGGTCCACAACG-3'       |
| SOD1_F      | 5'-GCACACTGGTGGTCCATGAAA-3'      |
| SOD1_R      | 5'-ACACCACAAGCCAAACGACT-3'       |
| SOD2_F      | 5'-GAACCCAAAGGGGAGTTGCT-3'       |
| SOD2_R      | 5'-AGCCTTGGACACCAACAGAT-3'       |
| p53_F       | 5'-GGGACGGAACAGCTTTGAGG-3'       |
| p53_R       | 5'-GTTGGGCAGTGCTCGCTTAG-3'       |
| p21_F       | 5'-GGATGAGTTGGGAGGAGGCA-3'       |
| p21_R       | 5'-GTGGTAGAAATCTGTCATGCTGGT-3'   |
